# Supplementary material
Source: ML conference proceedings conference paper supplement (https://openreview.net/forum?id=EeIEvZlmVg)
Supplement: supplementary_material [file Appendix_SuperCLIP.pdf › Appendix_SuperCLIP.pdf]

# 1 A Appendix

## 2 A.1 Additional Examples

3 **Evaluating Fine-Grained Alignment in Image-Text Retrieval.** We compare our trained SuperCLIP-  
 4 L 12.8B model with a CLIP-based model (using the current state-of-the-art SigLIP 2 -L as a represen-  
 5 tative) to demonstrate the superior performance of our model in fine-grained alignment. Additional  
 examples are provided in Fig.1 through Fig.4.

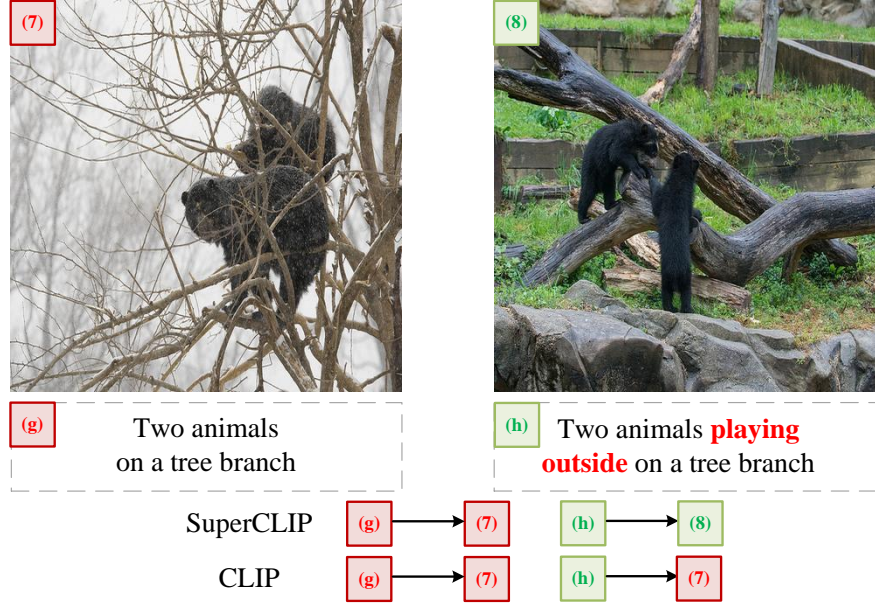

Figure 1: Two animals **playing** outside on a tree branch.

6

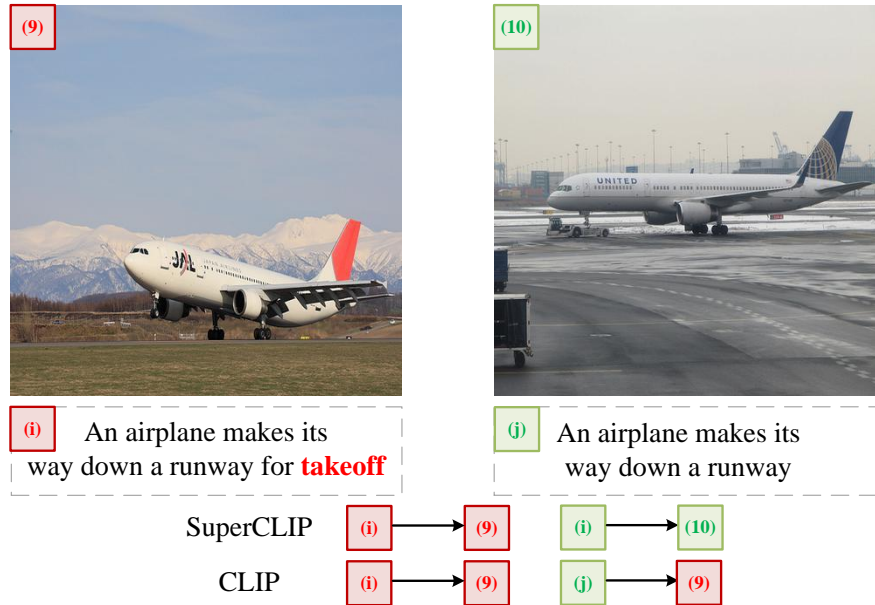

Figure 2: An airplane makes its way down a runway for **takeoff**.

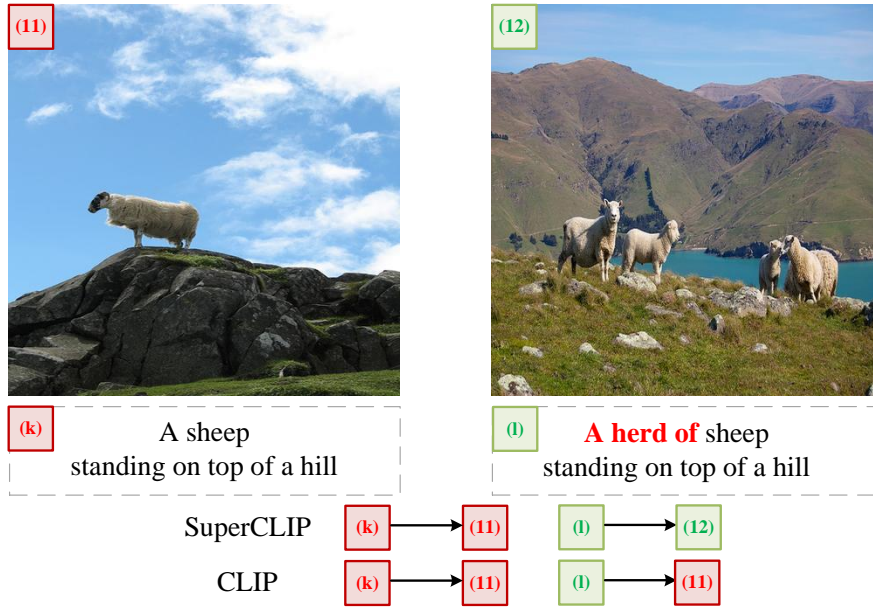

Figure 3: A **herd** of sheep standing on top of a hill.

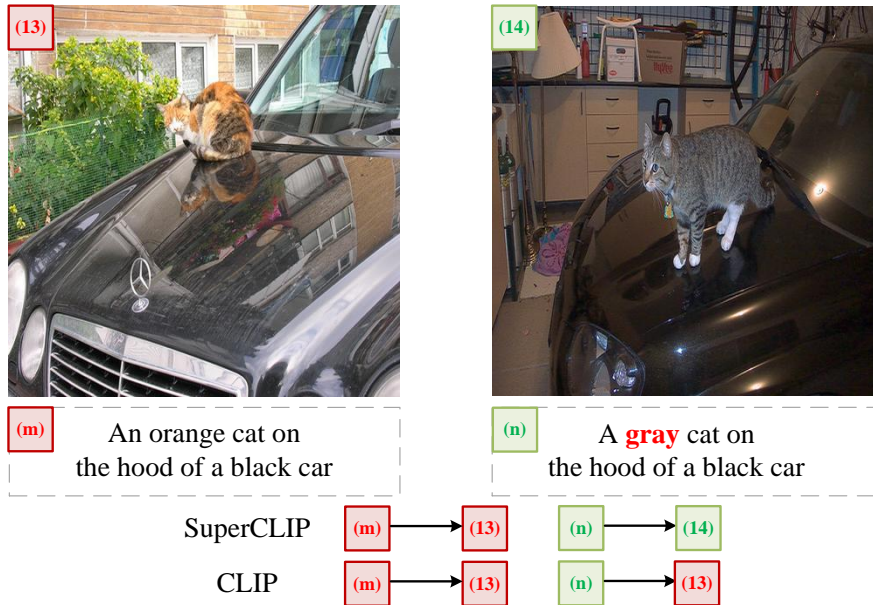

Figure 4: A **grey** cat on the hood of a black car.

## 7 A.2 Keyword Co-occurrence Statistics

8 We also searched for other keyword co-occurrence statistics in Datacomp-1B (10M captions). Each  
 9 example represents a common object pair (**Basic Pair**) combined with a more specific fine-grained  
 10 attribute. While the basic pairs tend to appear with relatively high frequency, adding specific fine-  
 11 grained attributes results in much lower occurrence rates. More keyword combination examples are  
 12 provided in Table 1 through Table 4.

| Keyword Group     | Animal(s) + Tree |             | Cat + Car  |               |
|-------------------|------------------|-------------|------------|---------------|
|                   | Basic Pair       | + play(ing) | Basic Pair | + orange/grey |
| Matching Captions | 367              | 2           | 216        | 6             |
| Percentage (%)    | 0.00367          | 0.00002     | 0.00216    | 0.00006       |

Table 1: **Keyword combination:** Animals(s) + **Play(ing)** + Tree and **Orange/Grey** + Cat + Car.

| Keyword Group     | Airplane + Runway |           | Sheep + Hill |         |
|-------------------|-------------------|-----------|--------------|---------|
|                   | Basic Pair        | + takeoff | Basic Pair   | + herd  |
| Matching Captions | 58                | 3         | 32           | 1       |
| Percentage (%)    | 0.00058           | 0.00003   | 0.00032      | 0.00001 |

Table 2: **Keyword combination:** Airplane + Runway + **takeoff** and **Herd** + Sheep+ Hill.

| Keyword Group     | Sign + Road |                 | Cat + Toilet |               |
|-------------------|-------------|-----------------|--------------|---------------|
|                   | Basic Pair  | + yellow/orange | Basic Pair   | + closed/open |
| Matching Captions | 1300        | 59              | 68           | 1             |
| Percentage (%)    | 0.01300     | 0.00059         | 0.00068      | 0.00001       |

Table 3: **Keyword combination:** Yellow/Orange + Sign + Road and Cat + **Open/Closed**+ Toilet.

| Keyword Group     | Man + Tie  |               | Cat + Screen |                    |
|-------------------|------------|---------------|--------------|--------------------|
|                   | Basic Pair | + fix(es/ing) | Basic Pair   | + watch/look (ing) |
| Matching Captions | 273        | 0             | 38           | 2                  |
| Percentage (%)    | 0.00273    | 0.00000       | 0.00038      | 0.00002            |

Table 4: **Keyword combination:** Man + **Fix(es/ing)** Tie and Cat + **Watch/Looking (ing)**+ Screen.

13 As shown in the tables above, common basic pairs such as **Animal + Tree** (Table 1) or **Man + Tie**  
 14 (Table 4) appear at a reasonable frequency. However, when more fine-grained attributes are added —  
 15 for example, an animal **playing** on a tree or a man **fixing** his tie — such captions become much rarer.

### 16 A.3 FLOPs Statistics

17 For the FLOPs analysis, the computational cost of the model primarily comes from the **Model**  
 18 **Components** and the **Loss Function**. We provide a detailed estimation of the FLOPs for both parts,  
 19 as outlined below. The results are summarized in Table 5.

| Component           | CLIP-B       | SuperCLIP-B  | CLIP-L       | SuperCLIP-L  |
|---------------------|--------------|--------------|--------------|--------------|
| Vision Encoder      | 16k * 16.868 | 16k * 16.868 | 16k * 59.689 | 16k * 59.689 |
| Text Encoder        | 16k * 2.911  | 16k * 2.911  | 16k * 6.547  | 16k * 6.547  |
| Linear Head         | –            | 16k * 0.038  | –            | 16k * 0.051  |
| Contrastive Loss    | 274.878      | 274.878      | 412.317      | 412.317      |
| Classification Loss | -            | 5.666        | -            | 5.666        |

Table 5: **Estimated FLOPs (in GFLOPs)** for different components of CLIP and SuperCLIP under a batch size of 16k. The only additional computation in SuperCLIP comes from the lightweight linear head and the classification loss.

20 **Model Component:** For the CLIP model, the main computational cost comes from the vision  
 21 encoder and text encoder. In SuperCLIP, in addition to these two components, a lightweight linear  
 22 head is also included, which adds a small amount of computation. We use the standard fvcare library  
 23 to compute the FLOPs for the vision encoder, text encoder, and the additional linear head in the CLIP  
 24 and SuperCLIP models using dummy inputs. Take the L-size model as an example:

- 25 • The dummy image input is a tensor of shape (1, 3, 224, 224), representing a batch of 1 RGB  
 26 image.
- 27 • The dummy text input is a tensor of shape (1, 77), simulating a tokenized text sequence with  
 28 77 tokens (the typical maximum sequence length in CLIP), drawn from a vocabulary of size  
 29 49,408.
- 30 • The dummy pooled image feature input to the linear head is a tensor of shape (1, 1024),  
 31 mimicking the average-pooled image embedding from the vision encoder.

32 In our results, the vision encoder consumes 59.698 GFLOPs, the text encoder consumes 6.547  
 33 GFLOPs, and the additional text decoder in SuperCLIP introduces only 0.051 GFLOPs, which  
 34 accounts for merely 0.077% of the total model computation.

35 **Loss Function:** To analyze the computational cost of our training objective, we estimate the  
 36 number FLOPs involved in the forward pass of the combined loss function  $\mathcal{L}_{\text{Total}}$ , which includes a  
 37 classification loss  $\mathcal{L}_{\text{Class}}$  and a contrastive loss  $\mathcal{L}_{\text{CLIP}}$ . For the classification loss, given a batch size of  
 38  $B$  and number of classes  $C$ , the total FLOPs include:

- 39 • **log\_softmax** over  $C$  classes: approximately  $5 \times B \times C$  FLOPs, accounting for exponentials,  
 40 reductions, and logarithms per sample;
- 41 • **element-wise multiplication** with target distribution:  $B \times C$  FLOPs;
- 42 • **summation** across class dimension:  $B \times (C - 1)$  FLOPs.

43 Thus, the total cost for classification loss is approximately  $7 \times B \times C$  FLOPs. For the contrastive  
 44 CLIP loss, assuming image and text features of dimension  $D$ , the dominant operation is the pairwise  
 45 dot product between  $B$  image and  $B$  text embeddings, resulting in a matrix multiplication of shape  
 46  $[B, D] \times [D, B]$ , which requires  $2 \times B^2 \times D$  FLOPs. Take the L-size model ( $C = 49,408$ ,  $D = 768$ )  
 47 as an example: with a batch size of 16k ( $B = 16,384$ ), computing the contrastive loss requires  
 48 approximately 412.317 GFLOPs, while the classification loss requires only 5.666 GFLOPs—about  
 49 1.374% of the former. The difference in computational cost between the two losses mainly arises  
 50 from the quadratic complexity of contrastive loss with respect to batch size.

#### 51 A.4 Word-Image Similarity

52 To better illustrate the differences between SuperCLIP and CLIP in terms of word-image similarity,  
 53 we present the representative words ranked in the **Top**, **Middle**, and **Last** 20 positions based on  
 54 word-image similarity scores. The results are shown in Table 6.

| Number | Top 20               |                 | Middle 20 |             | Last 20      |              |
|--------|----------------------|-----------------|-----------|-------------|--------------|--------------|
|        | CLIP                 | SuperCLIP       | CLIP      | SuperCLIP   | CLIP         | SuperCLIP    |
| 1      | zebras               | <u>brushing</u> | nintendo  | swimming    | looks        | animals      |
| 2      | giraffes             | <u>monitors</u> | walk      | color       | skies        | snowboarder  |
| 3      | kites                | <u>screen</u>   | onto      | walking     | are          | fashioned    |
| 4      | hydrant              | teeth           | hot       | dining      | itself       | skiing       |
| 5      | zebra                | wave            | roof      | sinks       | country      | skier        |
| 6      | <u>surfing</u>       | <u>sleeping</u> | beans     | assorted    | leaves       | fries        |
| 7      | <u>skateboarding</u> | racket          | alone     | motorcycles | types        | chain        |
| 8      | skateboarder         | beds            | shoes     | kite        | style        | bird         |
| 9      | surfer               | <u>laying</u>   | arranged  | trail       | beneath      | jump         |
| 10     | kite                 | <u>beside</u>   | friends   | donuts      | about        | pasta        |
| 11     | zoo                  | desk            | women     | down        | type         | zoo          |
| 12     | surfers              | pillow          | busy      | by          | which        | railroad     |
| 13     | <u>brushing</u>      | mouth           | ledge     | eaten       | body         | puppy        |
| 14     | snowboarder          | <u>inside</u>   | plastic   | cement      | does         | snowboarding |
| 15     | giraffe              | <u>stands</u>   | fly       | is          | professional | skis         |
| 16     | elephants            | <u>blurry</u>   | cars      | towards     | poses        | skateboard   |
| 17     | <u>petting</u>       | tarmac          | hair      | flower      | features     | skateboarder |
| 18     | donuts               | sheets          | wearing   | electronic  | watches      | tracks       |
| 19     | carriage             | suitcases       | helmet    | huge        | fashioned    | giraffe      |
| 20     | sheep                | <u>setting</u>  | chair     | working     | lush         | track        |

Table 6: Representative words from the **Top**, **Middle**, and **Last** 20 positions, selected based on word-image similarity scores computed by CLIP and SuperCLIP on the COCO validation set.

55 As shown in the table above, our model exhibits a significant shift in word ranking compared to CLIP.  
 56 While the top 20 words in CLIP are almost exclusively object categories, SuperCLIP successfully  
 57 promotes more fine-grained attribute words to higher rank, including those describing object status,  
 58 spatial relations, and actions—such as **Blurry**, **Inside**, and **Stand(s)**. This indicates that SuperCLIP  
 59 encourages the model to pay more attention to such fine-grained attribute-level concepts.

## 60 A.5 Complete Evaluation Results Across 38 Datasets

61 We evaluate all models using the open-source LAION CLIP Benchmark on zero-shot classification  
62 across 38 datasets. Results are shown in Table 7 (first 19) and Table 8 (remaining 19). As not all  
63 datasets are discussed in the main text, we include the remaining references in B.

| Model & Mixed         | MNIST [18] | VOC2007-Multi [7] | ImageNet-Sketch [29] | SVHN [22] | VOC2007 [7] | Pets [24] | SmallNORB [19] | Rendered SST2 [25] | Diabetic Ret. [11] | DSprites-X [21] | FER2013 [10] | ImageNet-V2 [26] | Caltech-101 [8] | ObjectNet [1] | DSprites-Ori [21] | DTD [4] | SmallNORB-Elev. [19] | PCam [28] | CLEVR-Distance [15] |
|-----------------------|------------|-------------------|----------------------|-----------|-------------|-----------|----------------|--------------------|--------------------|-----------------|--------------|------------------|-----------------|---------------|-------------------|---------|----------------------|-----------|---------------------|
| CLIP-B (1.0/0.0)      | 44.1       | 75.1              | 46.7                 | 39.2      | 79.6        | 81.5      | 5.7            | 50.0               | 3.5                | 3.7             | 31.4         | 52.8             | 84.7            | 50.0          | 2.4               | 41.8    | 10.9                 | 54.4      | 18.6                |
| SuperCLIP-B (1.0/0.0) | 43.1       | 78.0              | 50.9                 | 34.2      | 80.2        | 83.4      | 5.3            | 52.7               | 8.4                | 3.2             | 33.99        | 55.4             | 83.5            | 54.4          | 1.5               | 45.4    | 11.3                 | 52.1      | 15.8                |
| CLIP-B (0.0/1.0)      | 46.3       | 38.0              | 19.5                 | 17.0      | 59.9        | 19.7      | 5.7            | 48.2               | 28.8               | 3.1             | 42.7         | 18.6             | 64.3            | 24.4          | 1.6               | 23.4    | 13.7                 | 56.1      | 20.7                |
| SuperCLIP-B (0.0/1.0) | 60.1       | 55.2              | 28.1                 | 15.0      | 64.5        | 23.8      | 5.9            | 48.6               | 5.6                | 3.1             | 44.3         | 26.2             | 68.3            | 36.2          | 2.6               | 26.0    | 12.5                 | 56.0      | 17.1                |
| CLIP-B (0.8/0.2)      | 52.0       | 75.6              | 44.9                 | 35.4      | 79.7        | 81.1      | 5.4            | 48.3               | 11.1               | 3.1             | 39.6         | 51.2             | 82.9            | 49.2          | 2.5               | 41.6    | 11.1                 | 49.9      | 19.3                |
| SuperCLIP-B (Dual)    | 64.1       | 78.5              | 49.9                 | 37.8      | 80.7        | 83.8      | 5.5            | 49.8               | 4.4                | 3.3             | 32.2         | 55.8             | 83.6            | 56.9          | 2.5               | 43.8    | 11.1                 | 49.0      | 18.5                |
| CLIP-L (1.0/0.0)      | 55.6       | 77.4              | 55.2                 | 41.4      | 80.0        | 88.2      | 5.4            | 53.5               | 4.8                | 3.2             | 33.4         | 57.6             | 84.1            | 56.4          | 2.2               | 44.4    | 12.4                 | 50.5      | 15.8                |
| SuperCLIP-L (1.0/0.0) | 62.3       | 80.0              | 59.1                 | 45.7      | 81.1        | 90.1      | 5.3            | 55.0               | 6.1                | 3.1             | 37.1         | 62.3             | 84.9            | 63.0          | 1.9               | 52.4    | 11.2                 | 50.6      | 15.4                |
| CLIP-L (0.0/1.0)      | 37.6       | 41.7              | 22.6                 | 26.0      | 60.0        | 26.4      | 5.3            | 50.3               | 72.0               | 3.2             | 28.4         | 21.4             | 66.5            | 28.5          | 2.5               | 24.7    | 9.8                  | 54.6      | 15.9                |
| SuperCLIP-L (0.0/1.0) | 69.2       | 56.3              | 30.3                 | 22.3      | 67.4        | 25.6      | 6.2            | 52.8               | 7.0                | 3.0             | 44.2         | 27.8             | 66.1            | 44.2          | 2.5               | 24.1    | 9.6                  | 59.6      | 23.5                |
| CLIP-L (0.8/0.2)      | 63.3       | 77.3              | 50.8                 | 38.8      | 80.9        | 83.9      | 5.5            | 51.1               | 59.8               | 3.2             | 43.6         | 56.0             | 84.2            | 54.4          | 2.5               | 43.1    | 11.9                 | 50.2      | 15.6                |
| SuperCLIP (Dual)      | 74.2       | 79.7              | 56.7                 | 47.6      | 82.3        | 88.4      | 5.4            | 53.7               | 15.0               | 2.9             | 42.4         | 61.4             | 84.2            | 64.8          | 2.4               | 48.8    | 11.2                 | 56.3      | 19.5                |

Table 7: Zero-shot classification accuracy (%) on 38 datasets (first 19).

| Model & Mixed         | ImageNet-R [13] | DMLab [2] | DSprites-Y [21] | EuroSAT [12] | CIFAR100 [17] | FGVC Aircraft [20] | RESISC45 [3] | SUN397 [30] | GTSRB [27] | CIFAR10 [17] | CLEVR-Count [15] | KITTI-Distance [9] | Cars [16] | ImageNet-O [14] | STL10 [5] | Flowers [23] | Country211 [25] | Imagenet-a [13] | Imagenet1k [6] |
|-----------------------|-----------------|-----------|-----------------|--------------|---------------|--------------------|--------------|-------------|------------|--------------|------------------|--------------------|-----------|-----------------|-----------|--------------|-----------------|-----------------|----------------|
| CLIP-B (1.0/0.0)      | 66.8            | 21.3      | 3.1             | 51.8         | 74.8          | 12.2               | 48.4         | 62.3        | 39.4       | 93.3         | 24.9             | 29.7               | 75.1      | 52.2            | 95.0      | 60.7         | 12.6            | 21.4            | 60.6           |
| SuperCLIP-B (1.0/0.0) | 73.7            | 19.5      | 3.2             | 58.9         | 76.5          | 11.8               | 53.9         | 64.7        | 37.8       | 94.7         | 20.9             | 26.2               | 78.5      | 47.4            | 96.5      | 62.8         | 13.7            | 27.8            | 63.7           |
| CLIP-B (0.0/1.0)      | 37.2            | 16.1      | 3.3             | 37.3         | 49.5          | 1.9                | 24.6         | 25.6        | 13.9       | 79.7         | 20.3             | 39.5               | 9.1       | 30.4            | 83.4      | 12.5         | 1.1             | 6.8             | 22.4           |
| SuperCLIP-B (0.0/1.0) | 50.1            | 20.9      | 2.9             | 46.0         | 59.4          | 2.1                | 38.3         | 35.1        | 38.8       | 86.0         | 17.4             | 28.4               | 15.1      | 28.1            | 91.6      | 13.1         | 1.5             | 14.0            | 30.1           |
| CLIP-B (0.8/0.2)      | 65.7            | 18.4      | 3.2             | 47.6         | 73.2          | 9.7                | 49.5         | 62.3        | 35.6       | 93.1         | 25.3             | 20.4               | 73.5      | 52.8            | 94.8      | 57.6         | 11.4            | 20.5            | 59.4           |
| SuperCLIP-B (Dual)    | 74.3            | 19.9      | 3.1             | 48.8         | 77.3          | 12.0               | 56.6         | 65.4        | 43.1       | 95.2         | 22.5             | 29.1               | 76.8      | 46.2            | 96.5      | 62.3         | 13.5            | 30.0            | 63.6           |
| CLIP-L (1.0/0.0)      | 76.0            | 18.7      | 3.2             | 43.6         | 79.6          | 15.9               | 57.9         | 66.0        | 43.2       | 95.0         | 17.2             | 26.0               | 84.0      | 47.0            | 96.9      | 65.8         | 15.0            | 29.4            | 66.1           |
| SuperCLIP-L (1.0/0.0) | 83.1            | 15.6      | 3.2             | 61.3         | 82.6          | 16.9               | 64.2         | 68.6        | 49.1       | 97.2         | 29.5             | 22.1               | 84.6      | 38.2            | 98.3      | 68.9         | 18.7            | 41.4            | 70.2           |
| CLIP-L (0.0/1.0)      | 42.0            | 19.7      | 3.1             | 44.8         | 52.8          | 2.1                | 35.9         | 30.5        | 20.1       | 82.4         | 15.2             | 31.6               | 10.4      | 31.9            | 86.0      | 11.1         | 1.5             | 8.8             | 25.1           |
| SuperCLIP-L (0.0/1.0) | 60.4            | 20.6      | 3.1             | 48.4         | 61.7          | 2.4                | 43.0         | 40.2        | 28.5       | 84.5         | 27.0             | 39.0               | 16.2      | 24.4            | 95.9      | 16.1         | 1.4             | 21.5            | 31.7           |
| CLIP-L (0.8/0.2)      | 73.1            | 20.4      | 3.2             | 48.4         | 78.0          | 11.3               | 57.5         | 65.4        | 43.8       | 95.5         | 17.9             | 25.9               | 76.2      | 47.3            | 96.5      | 64.8         | 13.5            | 28.8            | 64.0           |
| SuperCLIP (Dual)      | 82.7            | 15.8      | 3.1             | 58.7         | 82.3          | 15.6               | 62.8         | 69.1        | 50.6       | 97.3         | 34.7             | 25.9               | 81.8      | 39.8            | 97.2      | 66.1         | 16.5            | 44.8            | 68.9           |

Table 8: Zero-shot classification accuracy (%) on 38 datasets (remaining 19).



## 64 A.6 Experiments Compute Resources

65 All experiments are performed on a compute cluster with a maximum of 16 NVIDIA A100 GPUs.

## 66 B References (38 Datasets)

- 67 [1] Andrei Barbu, David Mayo, Julian Alverio, William Luo, Christopher Wang, Dan Gutfreund,  
68 Josh Tenenbaum, and Boris Katz. Objectnet: A large-scale bias-controlled dataset for pushing  
69 the limits of object recognition models. *Advances in neural information processing systems*, 32,  
70 2019.
- 71 [2] Charles Beattie, Joel Z Leibo, Denis Teplyashin, Tom Ward, Marcus Wainwright, Heinrich  
72 Küttler, Andrew Lefrancq, Simon Green, Víctor Valdés, Amir Sadik, et al. Deepmind lab. *arXiv*  
73 *preprint arXiv:1612.03801*, 2016.
- 74 [3] Gong Cheng, Junwei Han, and Xiaoqiang Lu. Remote sensing image scene classification:  
75 Benchmark and state of the art. *Proceedings of the IEEE*, 105(10):1865–1883, 2017.
- 76 [4] Mircea Cimpoi, Subhransu Maji, Iasonas Kokkinos, Sammy Mohamed, and Andrea Vedaldi.  
77 Describing textures in the wild. In *Proceedings of the IEEE conference on computer vision and*  
78 *pattern recognition*, pages 3606–3613, 2014.
- 79 [5] Adam Coates, Andrew Y Ng, and Honglak Lee. An analysis of single-layer networks in  
80 unsupervised feature learning. *Proceedings of the fourteenth international conference on*  
81 *artificial intelligence and statistics*, pages 215–223, 2011.
- 82 [6] Jia Deng, Wei Dong, Richard Socher, Li-Jia Li, Kai Li, and Li Fei-Fei. Imagenet: A large-  
83 scale hierarchical image database. In *2009 IEEE Conference on Computer Vision and Pattern*  
84 *Recognition*, pages 248–255, 2009.
- 85 [7] Mark Everingham, Luc Van Gool, Christopher KI Williams, John Winn, and Andrew Zisserman.  
86 The pascal visual object classes (voc) challenge. *International journal of computer vision*,  
87 88:303–338, 2010.
- 88 [8] Li Fei-Fei, Rob Fergus, and Pietro Perona. Learning generative visual models from few  
89 training examples: An incremental bayesian approach tested on 101 object categories. In *2004*  
90 *conference on computer vision and pattern recognition workshop*, pages 178–178. IEEE, 2004.
- 91 [9] Andreas Geiger, Philip Lenz, Christoph Stiller, and Raquel Urtasun. Vision meets robotics: The  
92 kitti dataset. *The international journal of robotics research*, 32(11):1231–1237, 2013.
- 93 [10] Ian J Goodfellow, Dumitru Erhan, Pierre Luc Carrier, Aaron Courville, Mehdi Mirza, Ben  
94 Hamner, Will Cukierski, Yichuan Tang, David Thaler, Dong-Hyun Lee, et al. Challenges in  
95 representation learning: A report on three machine learning contests. In *Neural information*  
96 *processing: 20th international conference, ICONIP 2013, daegu, korea, november 3-7, 2013.*  
97 *Proceedings, Part III 20*, pages 117–124. Springer, 2013.
- 98 [11] Varun Gulshan, Lily Peng, Marc Coram, Martin C Stumpe, Derek Wu, Arunachalam  
99 Narayanaswamy, Subhashini Venugopalan, Kasumi Widner, Tom Madams, Jorge Cuadros,  
100 et al. Development and validation of a deep learning algorithm for detection of diabetic  
101 retinopathy in retinal fundus photographs. *jama*, 316(22):2402–2410, 2016.
- 102 [12] Patrick Helber, Benjamin Bischke, Andreas Dengel, and Damian Borth. Eurosat: A novel  
103 dataset and deep learning benchmark for land use and land cover classification. *IEEE Journal*  
104 *of Selected Topics in Applied Earth Observations and Remote Sensing*, 12(7):2217–2226, 2019.
- 105 [13] Dan Hendrycks, Steven Basart, Norman Mu, Saurav Kadavath, Frank Wang, Evan Dorundo,  
106 Rahul Desai, Tyler Zhu, Samyak Parajuli, Mike Guo, et al. The many faces of robustness:  
107 A critical analysis of out-of-distribution generalization. In *Proceedings of the IEEE/CVF*  
108 *international conference on computer vision*, pages 8340–8349, 2021.

- [14] Dan Hendrycks, Kevin Zhao, Steven Basart, Jacob Steinhardt, and Dawn Song. Natural adversarial examples. In *Proceedings of the IEEE/CVF conference on computer vision and pattern recognition*, pages 15262–15271, 2021.
- [15] Justin Johnson, Bharath Hariharan, Laurens Van Der Maaten, Li Fei-Fei, C Lawrence Zitnick, and Ross Girshick. Clevr: A diagnostic dataset for compositional language and elementary visual reasoning. In *Proceedings of the IEEE conference on computer vision and pattern recognition*, pages 2901–2910, 2017.
- [16] Jonathan Krause, Michael Stark, Jia Deng, and Li Fei-Fei. Collecting a large-scale dataset of fine-grained car images. In *Second Workshop on Fine-Grained Visual Categorization*, 2013.
- [17] Alex Krizhevsky. Learning multiple layers of features from tiny images. Technical report, University of Toronto, 2009.
- [18] Yann LeCun, Léon Bottou, Yoshua Bengio, and Patrick Haffner. Gradient-based learning applied to document recognition. *Proceedings of the IEEE*, 86(11):2278–2324, 1998.
- [19] Yann LeCun, Fu Jie Huang, and Leon Bottou. Learning methods for generic object recognition with invariance to pose and lighting. In *Proceedings of the 2004 IEEE Computer Society Conference on Computer Vision and Pattern Recognition, 2004. CVPR 2004.*, volume 2, pages II–104. IEEE, 2004.
- [20] Subhransu Maji, Esa Rahtu, Juho Kannala, Matthew Blaschko, and Andrea Vedaldi. Fine-grained visual classification of aircraft. *arXiv preprint arXiv:1306.5151*, 2013.
- [21] Loic Matthey, Irina Higgins, Demis Hassabis, and Alexander Lerchner. dsprites: Disentanglement testing sprites dataset. <https://github.com/deepmind/dsprites-dataset/>, 2017.
- [22] Yuval Netzer, Tao Wang, Adam Coates, Alessandro Bissacco, Baolin Wu, Andrew Y Ng, et al. Reading digits in natural images with unsupervised feature learning. In *NIPS workshop on deep learning and unsupervised feature learning*, volume 2011, page 4. Granada, 2011.
- [23] Maria-Elena Nilsback and Andrew Zisserman. Automated flower classification over a large number of classes. In *2008 Sixth Indian conference on computer vision, graphics & image processing*, pages 722–729. IEEE, 2008.
- [24] Omkar M Parkhi, Andrea Vedaldi, Andrew Zisserman, and CV Jawahar. Cats and dogs. In *2012 IEEE conference on computer vision and pattern recognition*, pages 3498–3505. IEEE, 2012.
- [25] Alec Radford, Jong Wook Kim, Chris Hallacy, Aditya Ramesh, Gabriel Goh, Sandhini Agarwal, Girish Sastry, Amanda Askell, Pamela Mishkin, Jack Clark, et al. Learning transferable visual models from natural language supervision. In *International conference on machine learning*, pages 8748–8763. PmLR, 2021.
- [26] Benjamin Recht, Rebecca Roelofs, Ludwig Schmidt, and Vaishal Shankar. Do imagenet classifiers generalize to imagenet? In *International conference on machine learning*, pages 5389–5400. PMLR, 2019.
- [27] Johannes Stallkamp, Marc Schlipsing, Jan Salmen, and Christian Igel. The german traffic sign recognition benchmark: a multi-class classification competition. In *The 2011 international joint conference on neural networks*, pages 1453–1460. IEEE, 2011.
- [28] Bastiaan S Veeling, Jasper Linmans, Jim Winkens, Taco Cohen, and Max Welling. Rotation equivariant cnns for digital pathology. In *Medical image computing and computer assisted intervention—mICCAI 2018: 21st international conference, granada, Spain, September 16-20, 2018, proceedings, part II 11*, pages 210–218. Springer, 2018.
- [29] Haohan Wang, Songwei Ge, Zachary Lipton, and Eric P Xing. Learning robust global representations by penalizing local predictive power. In *Advances in Neural Information Processing Systems*, pages 10506–10518, 2019.
- [30] Jianxiong Xiao, James Hays, Krista A Ehinger, Aude Oliva, and Antonio Torralba. Sun database: Large-scale scene recognition from abbey to zoo. In *2010 IEEE computer society conference on computer vision and pattern recognition*, pages 3485–3492. IEEE, 2010.
